# Supplementary material for: Longitudinal Dynamics of Immune Response in Occupational Populations Post COVID-19 Infection in the Changning District of Shanghai, China
Source: MDPI journal article supplement (doi:10.3390/v16050672), 2024-04-25
Supplement: s1 [file s1]

## Supplementary Materials

**Table S1 Neutralizing antibody changes at different time points in different populations.**

|                     | NAbs <sup>1</sup> |                   |                   |                   |                   |
|---------------------|-------------------|-------------------|-------------------|-------------------|-------------------|
|                     | 3-month           | 4-month           | 5-month           | 6-month           | 7-month           |
| Total               | 3.39 (3.17, 3.57) | 3.29 (3.06, 3.53) | 3.28 (2.99, 3.50) | 3.27 (3.05, 3.48) | 3.23(3.03, 3.58)  |
| Sex                 |                   |                   |                   |                   |                   |
| Male                | 3.39 (3.16, 3.57) | 3.28 (3.02, 3.50) | 3.26 (2.99, 3.46) | 3.27 (3.04, 3.44) | 3.22 (3.01, 3.56) |
| Female              | 3.42 (3.22, 3.58) | 3.34 (3.18, 3.55) | 3.35 (3.13, 3.54) | 3.33 (3.13, 3.53) | 3.35 (3.12, 3.58) |
| Age, years          |                   |                   |                   |                   |                   |
| <35                 | 3.37 (3.17, 3.58) | 3.28 (3.04, 3.54) | 3.26 (3.02, 3.53) | 3.27 (3.08, 3.57) | 3.24 (3.07, 3.59) |
| ≥35                 | 3.39 (3.16, 3.55) | 3.33 (3.07, 3.52) | 3.29 (2.98, 3.49) | 3.31 (3.04, 3.42) | 3.22 (3.00, 3.56) |
| Occupation          |                   |                   |                   |                   |                   |
| Police officers     | 3.41 (3.17, 3.59) | 3.28 (3.03, 3.51) | 3.28 (2.99, 3.53) | 3.26 (3.03, 3.59) | 3.22 (3.01, 3.57) |
| Healthcare workers  | 3.36 (3.16, 3.57) | 3.32 (3.09, 3.55) | 3.28 (3.06, 3.50) | 3.33 (3.05, 3.43) | 3.34 (3.07, 3.58) |
| Symptom             |                   |                   |                   |                   |                   |
| No                  | 3.39 (3.20, 3.52) | 3.28 (3.06, 3.55) | 3.28 (2.99, 3.54) | 3.33 (3.02, 3.52) | 3.28 (3.00, 3.58) |
| Yes                 | 3.38 (3.16, 3.60) | 3.30 (3.09, 3.45) | 3.28 (3.11, 3.41) | 3.27 (3.12, 3.40) | 3.22 (3.11, 3.51) |
| Underlying diseases |                   |                   |                   |                   |                   |
| No                  | 3.39 (3.17, 3.57) | 3.29 (3.05, 3.54) | 3.29 (2.99, 3.51) | 3.30 (3.05, 3.47) | 3.22 (3.04, 3.59) |
| Yes                 | 3.43 (3.19, 3.60) | 3.31 (3.08, 3.47) | 3.25 (3.00, 3.49) | 3.24 (3.05, 3.48) | 3.42 (2.98, 3.56) |

<sup>1</sup> NAbs, Neutralizing antibodies.

**Table S2 IgG antibody changes at different time points in different populations.**

|                     | IgG <sup>1</sup>  |                   |                   |                   |                   |
|---------------------|-------------------|-------------------|-------------------|-------------------|-------------------|
|                     | 3-month           | 4-month           | 5-month           | 6-month           | 7-month           |
| Total               | 2.13 (1.92, 2.35) | 2.04 (1.82, 2.28) | 2.04 (1.81, 2.26) | 1.98 (1.79, 2.21) | 1.98 (1.72, 2.18) |
| Sex                 |                   |                   |                   |                   |                   |
| Male                | 2.08 (1.90, 2.31) | 2.01 (1.79, 2.23) | 1.97 (1.78, 2.25) | 1.94 (1.79, 2.18) | 1.93 (1.72, 2.15) |
| Female              | 2.20 (2.05, 2.43) | 2.17 (1.98, 2.43) | 2.12 (1.92, 2.34) | 2.09 (1.83, 2.26) | 2.04 (1.74, 2.30) |
| Age, years          |                   |                   |                   |                   |                   |
| <35                 | 2.08 (1.89, 2.35) | 2.01 (1.77, 2.30) | 1.96 (1.78, 2.26) | 1.95 (1.74, 2.18) | 2.00 (1.72, 2.16) |
| ≥35                 | 2.18 (2.04, 2.31) | 2.11 (1.91, 2.27) | 2.06 (1.86, 2.25) | 2.02 (1.82, 2.24) | 2.95 (1.74, 2.20) |
| Occupation          |                   |                   |                   |                   |                   |
| Police officers     | 2.16 (1.90, 2.35) | 2.02 (1.80, 2.28) | 2.05 (1.78, 2.26) | 1.94 (1.77, 2.20) | 1.94 (1.73, 2.16) |
| Healthcare workers  | 2.10 (1.93, 2.33) | 2.06 (1.90, 2.30) | 2.03 (1.86, 2.27) | 2.04 (1.80, 2.24) | 2.01 (1.72, 2.19) |
| Symptom             |                   |                   |                   |                   |                   |
| No                  | 2.13 (1.93, 2.37) | 2.07 (1.84, 2.38) | 2.03 (1.80, 2.32) | 2.04 (1.77, 2.25) | 2.01 (1.71, 2.22) |
| Yes                 | 2.13 (1.84, 2.20) | 1.99 (1.69, 2.16) | 2.05 (1.86, 2.17) | 1.94 (1.79, 2.14) | 1.94 (1.76, 2.11) |
| Underlying diseases |                   |                   |                   |                   |                   |
| No                  | 2.15 (1.93, 2.35) | 2.05 (1.83, 2.27) | 2.05 (1.85, 2.26) | 2.02 (1.80, 2.19) | 1.96 (1.73, 2.16) |
| Yes                 | 2.04 (1.91, 2.40) | 1.92 (1.81, 2.37) | 1.88 (1.78, 2.32) | 1.80 (1.74, 2.25) | 2.03 (1.71, 2.22) |

<sup>1</sup> IgG, Immunoglobulin G.

**Table S3 Peripheral blood lymphocyte subsets of 66 individuals who have infected with COVID-19 across three follow-ups.**

|                        | Median (IQR)              |                           |                           |              | Abnormality rate, % |         |         |
|------------------------|---------------------------|---------------------------|---------------------------|--------------|---------------------|---------|---------|
|                        | 3-month                   | 5-month                   | 7-month                   | P            | 3-month             | 5-month | 7-month |
| CD3+ % <sup>1</sup>    | 66.04 (61.54, 69.46)      | 65.68 (60.57, 69.89)      | 65.44 (61.38, 70.12)      | 0.916        | 24.24               | 22.73   | 25.76   |
| CD4+ %                 | 34.91 (30.97, 38.84)      | 33.17 (29.06, 39.83)      | 34.19 (30.86, 39.44)      | 0.542        | 37.88               | 36.36   | 33.33   |
| CD8+ %                 | 24.49 (20.12, 28.30)      | 23.56 (19.38, 28.18)      | 23.83 (19.97, 28.51)      | 0.725        | 6.06                | 4.55    | 6.06    |
| CD4+/CD8+ ratio        | 1.41 (1.18, 1.96)         | 1.38 (1.06, 1.87)         | 1.50 (1.12, 1.83)         | 0.945        | 33.33               | 34.85   | 30.30   |
| B cell %               | 12.99 (10.39, 16.63)      | 13.67 (10.80, 18.03)      | 13.48 (10.54, 17.08)      | 0.620        | 33.33               | 28.79   | 30.30   |
| NK cell %              | 15.78 (12.31, 21.78)      | 15.90 (11.55, 21.59)      | 16.58 (11.68, 20.85)      | 0.994        | 10.61               | 9.09    | 10.61   |
| Total T cell count     | 1008.72 (768.80, 1239.19) | 1091.02 (929.79, 1374.67) | 1096.05 (804.86, 1297.26) | 0.090        | 28.79               | 13.64   | 25.76   |
| Helper T cell count    | 521.17 (433.67, 649.98)   | 585.95 (460.07, 690.99)   | 514.63 (416.74, 663.02)   | 0.138        | 15.15               | 4.54    | 12.12   |
| Cytotoxin T cell count | 361.09 (257.64, 535.48)   | 389.10 (298.40, 580.65)   | 375.67 (253.73, 518.45)   | 0.361        | 43.94               | 33.33   | 42.42   |
| B cell count           | 194.48 (136.08, 260.44)   | 241.97 (175.42, 280.59)   | 204.20 (167.42, 269.51)   | <b>0.040</b> | 69.70               | 50.00   | 65.15   |
| NK cell count          | 242.39 (151.32, 343.97)   | 281.70 (186.47, 367.33)   | 267.49 (177.64, 350.06)   | 0.382        | 45.45               | 33.33   | 33.33   |

<sup>1</sup> Percentage: the percentage of immune cells in whole blood. Count: the absolute count of immune cells in per microliter of blood.

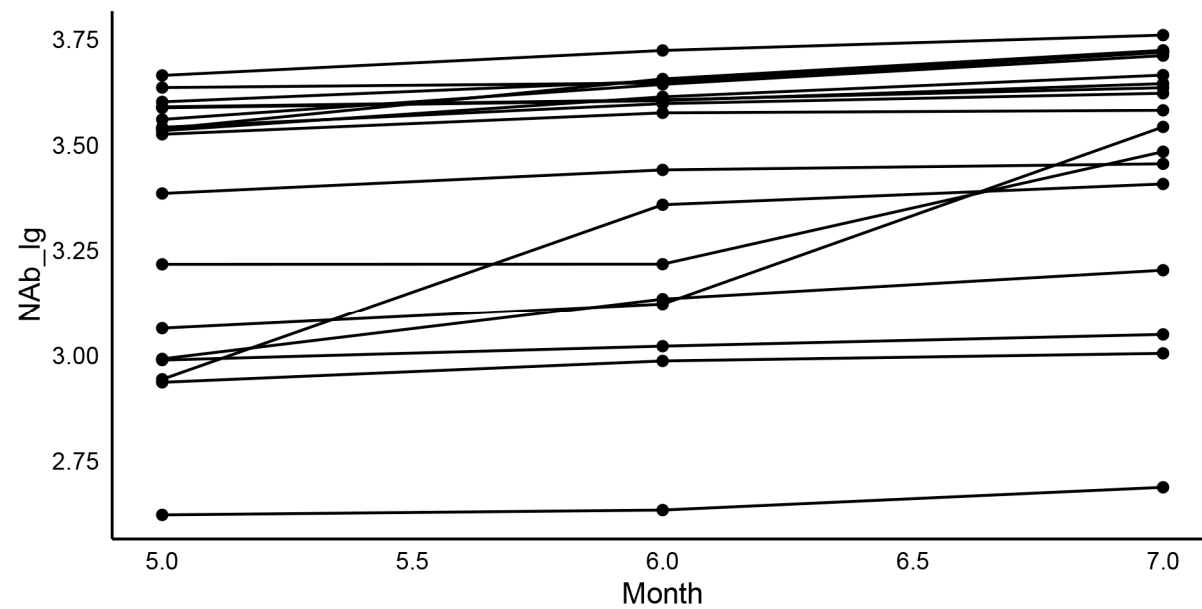

**Figure S1.** Upward Trend of NAb's Over 5, 6, and 7 months. Lg: logarithmic value to the base 10. NAb, Neutralizing antibody.

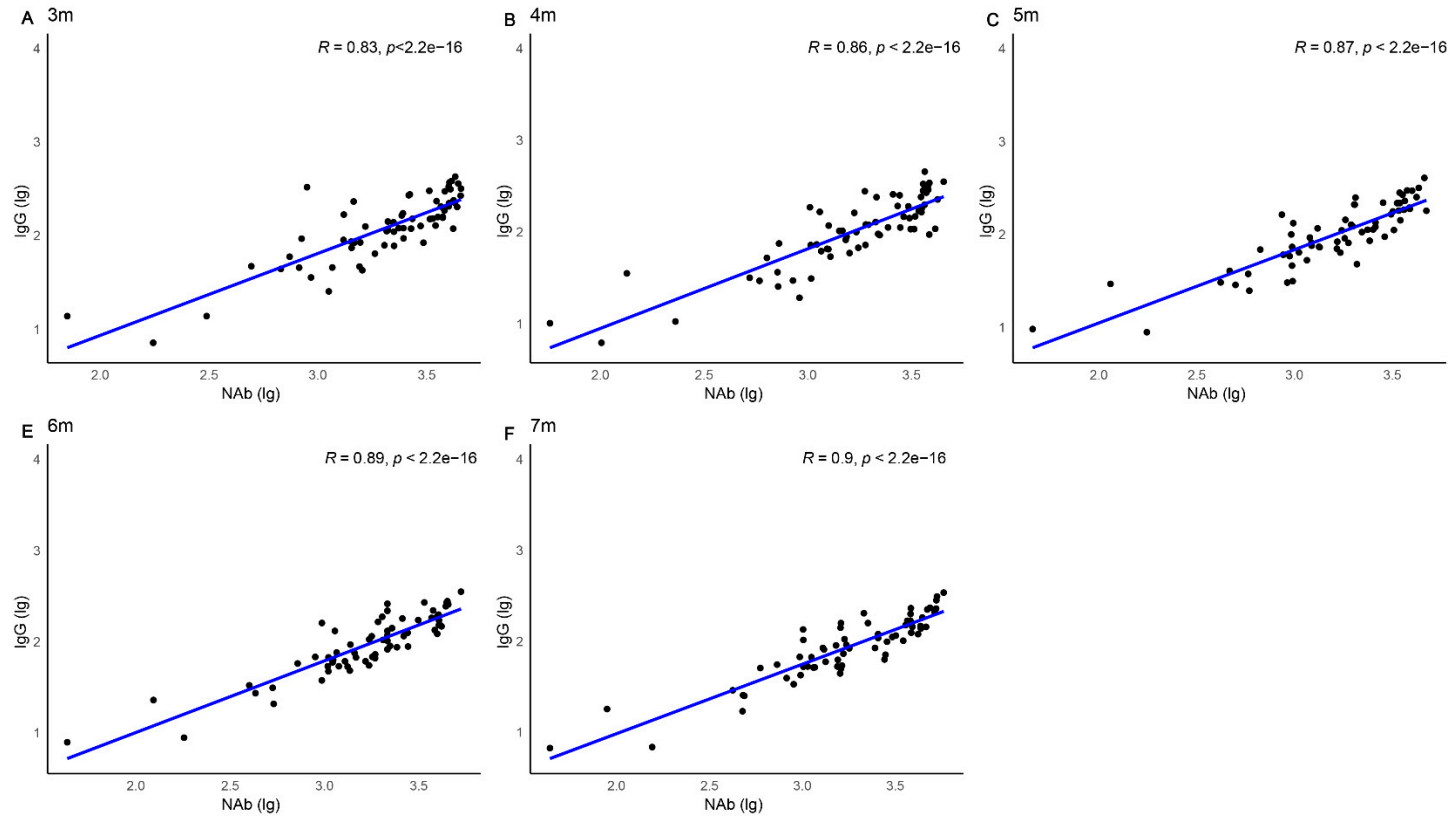

**Figure S2.** The correlation of NAb and IgG antibodies across the five follow-up visits. Lg: logarithmic value to the base 10. IgG, Immunoglobulin G. NAb, Neutralizing antibody.
